# Supplementary material
Source: PubMed Central journal article supplement (PMC166197)
Supplement: pnas_100_14_8146__7.pdf [file pnas_100_14_8146__7.pdf]

**Fig. 6.** Representative data from an isothermal titration calorimetry experiment. The cell (1.34 ml) contained 36.8  $\mu\text{M}$  *A. aeolicus* LpxC in 0.1 M NaCl, 0.8% (vol/vol) DMSO, and 25 mM Hepes (pH 7.0) at 30°C. The syringe contained 250  $\mu\text{M}$  lauric acid in the same buffer. Thirty injections (8.0  $\mu\text{l}$  each) were made at 180-sec intervals. (*Upper*) Raw data are shown with integration baseline. (*Lower*) Shown are data after peak integration and subtraction of control data. The solid line is the fit to the single binding model. Curve fitting for this titration gave the following results:  $n = 0.558 \pm 0.0046$ ,  $K_a = (3.39 \pm 0.43) \times 10^6 \text{ M}^{-1}$ , and  $H = -3316 \pm 41.3 \text{ cal/mol}$ .
