# Supplementary material
Source: PubMed Central journal article supplement (PMC166197)

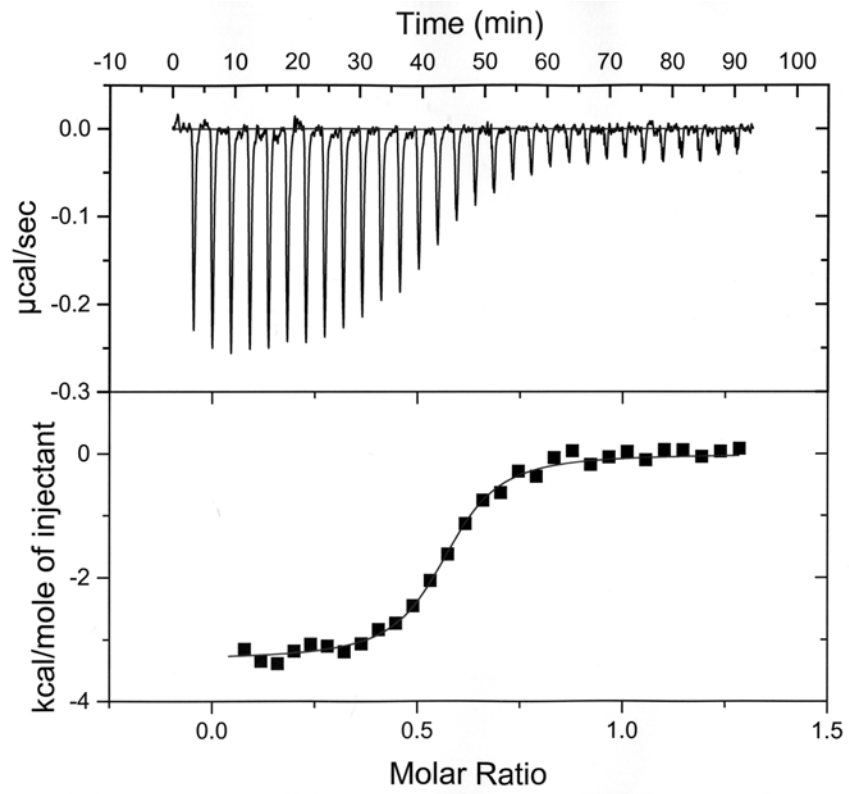

Supplement: pnas_100_14_8146__3.pdf [file pnas_100_14_8146__3.pdf]
